# Supplementary material
Source: Elsevier journal article supplement (https://rcastoragev2.blob.core.windows.net/51a734a5cb2505f89422c6cec819dc35/mmc1.pdf)
Supplement: mmc1 [file mmc1.pdf]

Cell, Volume 136

## Supplemental Data

### Large-Scale Structural Analysis of the Classical Human

### Protein Tyrosine Phosphatome

Alastair J. Barr, Emilie Ugochukwu, Wen Hwa Lee, Oliver N. F. King, Panagis Filippakopoulos, Ivan Alfano, Pavel Savitsky, Nicola A. Burgess-Brown, Susanne Müller, Stefan Knapp

## Supplemental Experimental Procedures

**Protein Expression and Purification:** cells were cultured in LB containing either ampicillin (100 µg/ml) or kanamycin (50 µg/ml) at 37 °C until the OD<sub>600</sub> reached ~0.3 then the temperature was adjusted to 18 °C. Expression was induced for 12 h using 1 mM IPTG at an OD<sub>600</sub> of 0.8. Cell pellets were resuspended in either 50mM HEPES pH 7.5, 500 mM NaCl, 5 mM imidazole, 5% glycerol, 0.5 mM TCEP for His tag fusion proteins or 50 mM Tris-HCl, pH 7.5, 250 mM NaCl, 10 mM DTT for GST fusion proteins, and cells were lysed using a high pressure cell disrupter. The lysate was cleared by centrifugation. For 6 x His fusions, supernatants were loaded onto a DEAE cellulose column, to remove nucleic acids, followed by a Ni<sup>2+</sup>-NTA agarose column. Columns were washed with 50mM HEPES pH 7.5, 500 mM NaCl, 30 mM imidazole, 5% glycerol, 0.5 mM TCEP and eluted step-wise with a gradient of 50-250 mM imidazole. The 6 x His tag of certain constructs was cleaved by incubating the protein overnight with TEV protease at 4 °C. For GST fusions, the supernatants were loaded onto glutathione-sepharose, washed with 50 mM Tris-HCl, pH 7.5, 250 mM NaCl, 10 mM DTT and digested with PreScission protease overnight at 4 °C. Cleaved protein was eluted with three volumes of binding buffer. Proteins were further purified by gel-filtration

over Superdex-200 or by ion-exchange on HiTrap Q, and concentrated using Centricon concentrators (10 kDa cut-off).

**Enzymatic Assays:** Phosphatase activity against phospho-peptides was measured using the EnzCheck® (Invitrogen) continuous spectrophotometric assay which is based upon the purine nucleoside phosphorylase (PNP)-coupled assay reported by (Webb, 1992). Reactions were measured in a 384 well plate in 80  $\mu$ l containing 50 mM Tris-HCl, pH 7.4, 1 mM  $MgCl_2$ , 50 mM NaCl, 1 mM DTT, 200  $\mu$ M MESG (2-amino-6-mercapto-7-methylpurine riboside), 1 U/ml PNP, 125  $\mu$ M of the phospho-peptide and PTP concentrations as shown in Figure 5. The concentration of each purified PTP enzyme used (ranging from 45 nM to 5  $\mu$ M) was adjusted based on the specific activity of each enzyme towards DiFMUP. PNP and MESG concentrations were optimized to ensure that the phosphatase activity was rate limiting. Absorbances were measured continuously at 360 nm using a Spectramax plate reader at room temperature and initial linear reaction rates were calculated over a 5 minute reaction. Specific activity (fluorescence units/sec/fmole) towards 6,8-difluoro-4-methylumbelliferyl phosphate (DiFMUP) was measured in 384 well plate format using a buffer containing 25mM MOPS, pH 7, 50 mM NaCl and 1 mM DTT and an excitation and emission wavelengths of 355 nm and 460 nm, respectively.

**Table S1****Crystallographic data and refinement statistics**

| <b>Data collection</b>                     | <b>2AHS (RPTP<math>\beta</math>)</b> | <b>2GJT (GLEPP1)</b>  | <b>2NZ6 (DEP1-C/S)</b> | <b>2CFV (DEP1-W/A)</b> |
|--------------------------------------------|--------------------------------------|-----------------------|------------------------|------------------------|
| Space group                                | P6 <sub>1</sub> 22                   | P6 <sub>5</sub>       | H3                     | H3                     |
| Cell dimensions [Å]                        | 123.37, 123.37, 179.57               | 131.06, 131.06, 77.53 | 88.52, 88.52, 118.95   | 86.06, 86.06, 119.54   |
| Cell angles [°]                            | 90.00, 90.00, 120.00                 | 90.00, 90.00, 120.00  | 90.00, 90.00, 120.00   | 90.00, 90.00, 120.00   |
| Resolution [Å]                             | 2.10                                 | 2.15                  | 2.30                   | 2.50                   |
| Total obs. (Unique, red.)                  | 597804 (47341, 12.6)                 | 231863 (41322, 5.6)   | 50144 (15274, 3.3)     | 43745 (11491, 3.76)    |
| Completeness (outer shell)                 | 99.2% (95.1%)                        | 99.9% (99.4%)         | 99.2% (95.0%)          | 98.8% (91.2%)          |
| R <sub>merge</sub>                         | 0.097                                | 0.0786                | 0.089                  | 0.06                   |
| I/ $\sigma$ (outer shell)                  | 18.6 (2.50)                          | 12.9 (2.87)           | 11.5 (2.70)            | 15.25 (4.18)           |
| <b><u>Refinement</u></b>                   |                                      |                       |                        |                        |
| R <sub>work</sub> (R <sub>free</sub> ) (%) | 15.2 (20.6)                          | 17.9 (23.4)           | 18.2 (22.8)            | 20.1 (25.0)            |
| Protein atoms (water)                      | 4502 (479)                           | 4608 (213)            | 2393 (94)              | 2130 (25)              |
| Rmsd bond length [Å]                       | 0.013                                | 0.017                 | 0.011                  | 0.012                  |
| Rmsd bond angle                            | 1.337                                | 1.587                 | 1.291                  | 1.296                  |
| Hetero groups:                             | CL, EDO, NA                          | CL                    | CL, NI, PO4            | CL, NI                 |
| <b><u>Ramachandran</u></b>                 |                                      |                       |                        |                        |
| (allowed, disallowed) [%]                  | 100.0, 0.0                           | 99.6, 0.4             | 100.0, 0.0             | 99.6, 0.4              |

| <b>Data collection</b>                     | <b>2C7S (RPTP<sub>K</sub>)</b>   | <b>2OOQ (RPTP<sub>D</sub>)</b> | <b>2NLK (RPTP<sub>Y</sub> D1-D2)</b> | <b>2H4V (RPTP<sub>Y</sub> D1)</b>             |
|--------------------------------------------|----------------------------------|--------------------------------|--------------------------------------|-----------------------------------------------|
| Space group                                | P4 <sub>3</sub> 2 <sub>1</sub> 2 | P2 <sub>1</sub>                | P2 <sub>1</sub> 2 <sub>1</sub> 2     | P2 <sub>1</sub> 2 <sub>1</sub> 2 <sub>1</sub> |
| Cell dimensions [Å]                        | 91.37, 91.37, 108.42             | 37.19, 86.70, 91.12            | 118.51, 134.00, 59.08                | 74.85, 78.86, 121.76                          |
| Cell angles [°]                            | 90.00, 90.00, 90.00              | 90.00, 99.89, 90.00            | 90.00, 90.00, 90.00                  | 90.00, 90.00, 90.00                           |
| Resolution [Å]                             | 1.95                             | 1.80                           | 2.40                                 | 1.55                                          |
| Total obs. (Unique, red.)                  | 228037 (32866, 6.1)              | 196449 (52802, 3.7)            | 156862 (37418, 4.2)                  | 762141 (105096, 7.3)                          |
| Completeness (outer shell)                 | 96.3% (87.7%)                    | 100.0% (100.0%)                | 99.5% (98.6%)                        | 100.0% (100.0%)                               |
| R <sub>merge</sub>                         | 0.0797                           | 0.092                          | 0.099                                | 0.079                                         |
| I/σ (outer shell)                          | 11.14 (4.19)                     | 16.0 (2.6)                     | 14.2 (1.9)                           | 16.0 (2.0)                                    |
| <b>Refinement</b>                          |                                  |                                |                                      |                                               |
| R <sub>work</sub> (R <sub>free</sub> ) (%) | 20.0 (21.8)                      | 14.5 (18.8)                    | 23.7 (27.4)                          | 16.1 (18.1)                                   |
| Protein atoms (water)                      | 2307 (138)                       | 4464 (441)                     | 4386 (150)                           | 4645 (562)                                    |
| Rmsd bond length [Å]                       | 0.011                            | 0.015                          | 0.015                                | 0.013                                         |
| Rmsd bond angle                            | 1.202                            | 1.453                          | 1.565                                | 1.411                                         |
| Hetero groups:                             | ACT                              | B3P, EDO, NA                   |                                      | ACT, CL, EDO, FLC, NA                         |
| <b>Ramachandran</b>                        |                                  |                                |                                      |                                               |
| (allowed, disallowed) [%]                  | 100.0, 0.0                       | 99.8, 0.2                      | 100.0, 0.0                           | 99.7, 0.3                                     |

| <b>Data collection</b>                     | <b>2BIJ (STEP)</b>                            | <b>2BV5 (STEP)</b>                            | <b>2CJZ (STEP-C/S &amp; pY)</b>               | <b>2A3K (HePTP)</b>                           |
|--------------------------------------------|-----------------------------------------------|-----------------------------------------------|-----------------------------------------------|-----------------------------------------------|
| Space group                                | P2 <sub>1</sub> 2 <sub>1</sub> 2 <sub>1</sub> | P2 <sub>1</sub> 2 <sub>1</sub> 2 <sub>1</sub> | P2 <sub>1</sub> 2 <sub>1</sub> 2 <sub>1</sub> | P2 <sub>1</sub> 2 <sub>1</sub> 2 <sub>1</sub> |
| Cell dimensions [Å]                        | 51.81, 64.32, 101.08                          | 39.96, 64.01, 136.15                          | 52.34, 64.35, 100.78                          | 39.13, 80.97, 100.39                          |
| Cell angles [°]                            | 90.00, 90.00, 90.00                           | 90.00, 90.00, 90.00                           | 90.00, 90.00, 90.00                           | 90.00, 90.00, 90.00                           |
| Resolution [Å]                             | 2.05                                          | 1.80                                          | 1.7                                           | 2.55                                          |
| Total obs. (Unique, red.)                  | 107431 (20825, 4.71)                          | 167346 (32877, 4.97)                          | 130114 (37692, 3.4)                           | 38503 (10922, 3.5)                            |
| Completeness (outer shell)                 | 95.0% (97.4%)                                 | 98.7% (95.4%)                                 | 98.5% (91.6%)                                 | 99.4% (96.6%)                                 |
| R <sub>merge</sub>                         | 0.0867                                        | 0.0823                                        | 0.0713                                        | 0.128                                         |
| I/σ (outer shell)                          | 11.41 (3.05)                                  | 12.90 (2.54)                                  | 11.92 (3.07)                                  | 9.22 (2.05)                                   |
| <b>Refinement</b>                          |                                               |                                               |                                               |                                               |
| R <sub>work</sub> (R <sub>free</sub> ) (%) | 21.2 (26.4)                                   | 16.4 (20.1)                                   | 17.5 (20.5)                                   | 21.9 (27.5)                                   |
| Protein atoms (water)                      | 2272 (103)                                    | 2296 (271)                                    | 2204 (213)                                    | 2134 (32)                                     |
| Rmsd bond length [Å]                       | 0.015                                         | 0.011                                         | 0.008                                         | 0.011                                         |
| Rmsd bond angle                            | 1.484                                         | 1.322                                         | 1.107                                         | 1.270                                         |
| Hetero groups:                             | SO4                                           | GOL, SO4                                      | EDO, PTR                                      | PO4                                           |
| <b>Ramachandran</b>                        |                                               |                                               |                                               |                                               |
| (allowed, disallowed) [%]                  | 99.6, 0.4                                     | 99.7, 0.3                                     | 99.6, 0.4                                     | 99.2, 0.8                                     |

| <b>Data collection</b>                     | <b>2A8B (PCPTP1)</b>             | <b>2QEP (IA2β)</b>               | <b>2P6X (LYP)</b>    | <b>2BZL (PTPD2)</b>  |
|--------------------------------------------|----------------------------------|----------------------------------|----------------------|----------------------|
| Space group                                | P2 <sub>1</sub> 2 <sub>1</sub> 2 | P2 <sub>1</sub> 2 <sub>1</sub> 2 | P2 <sub>1</sub>      | P3 <sub>2</sub> 21   |
| Cell dimensions [Å]                        | 63.19, 74.10, 62.33              | 131.54, 136.55, 35.75            | 60.96, 48.44, 119.81 | 87.64, 87.64, 77.11  |
| Cell angles [°]                            | 90.00, 90.00, 90.00              | 90.00, 90.00, 90.00              | 90.00, 102.84, 90.00 | 90.00, 90.00, 120.00 |
| Resolution [Å]                             | 2.30                             | 2.50                             | 1.90                 | 1.65                 |
| Total obs. (Unique, red.)                  | 46787 (13031, 3.6)               | 79716 (23096, 3.5)               | 201242 (54178, 3.7)  | 288670 (41374, 6.73) |
| Completeness (outer shell)                 | 97.0% (98.4%)                    | 99.5% (99.7%)                    | 100.0% (100.0%)      | 99.5% (99.1%)        |
| R <sub>merge</sub>                         | 0.105                            | 0.139                            | 0.080                | 0.0939               |
| I/σ (outer shell)                          | 10.5 (3.5)                       | 9.1 (1.9)                        | 13.1 (3.3)           | 15.08 (2.05)         |
| <b><u>Refinement</u></b>                   |                                  |                                  |                      |                      |
| R <sub>work</sub> (R <sub>free</sub> ) (%) | 19.2 (25.6)                      | 23.6 (28.6)                      | 16.4 (21.7)          | 18.5 (21.7)          |
| Protein atoms (water)                      | 2220 (132)                       | 4413 (39)                        | 4853 (373)           | 2268 (244)           |
| Rmsd bond length [Å]                       | 0.011                            | 0.011                            | 0.018                | 0.008                |
| Rmsd bond angle                            | 1.317                            | 1.310                            | 1.518                | 1.167                |
| Hetero groups:                             | CL                               | CL                               | CL, EDO              | EDO, SO4             |
| <b><u>Ramachandran</u></b>                 |                                  |                                  |                      |                      |
| (allowed, disallowed) [%]                  | 99.6, 0.4                        | 99.6, 0.4                        | 100.0, 0.0           | 99.6, 0.4            |

| <b>Data collection</b>                     | <b>2PA5 (MEG2)</b>  | <b>2B49 (PTPH1)</b>  | <b>2I75 (MEG1)</b>               | <b>3B7O (SHP2 D1)</b>   |
|--------------------------------------------|---------------------|----------------------|----------------------------------|-------------------------|
| Space group                                | P1                  | C2                   | P4 <sub>1</sub> 2 <sub>1</sub> 2 | C222 <sub>1</sub>       |
| Cell dimensions [Å]                        | 39.97, 57.43, 66.45 | 62.67, 61.24, 75.89  | 66.07, 66.07, 144.51             | 44.813, 86.496, 166.555 |
| Cell angles [°]                            | 77.44, 78.22, 80.41 | 90.00, 101.21, 90.00 | 90.00, 90.00, 90.00              | 90.00, 90.00, 90.00     |
| Resolution [Å]                             | 1.60                | 1.54                 | 2.45                             | 1.60                    |
| Total obs. (Unique, red.)                  | 142225 (71616, 2.0) | 190501 (41752, 4.6)  | 74276 (11901, 6.2)               | 174991 (43184, 4.1)     |
| Completeness (outer shell)                 | 96.9% (95.3%)       | 99.7% (99.1%)        | 95.6% (98.6%)                    | 99.9% (100%)            |
| R <sub>merge</sub>                         | 0.063               | 0.085                | 0.167                            | 0.092                   |
| I/σ (outer shell)                          | 9.0 (2.1)           | 13.7 (2.0)           | 10.2 (1.8)                       | 13.3 (2.0)              |
| <b>Refinement</b>                          |                     |                      |                                  |                         |
| R <sub>work</sub> (R <sub>free</sub> ) (%) | 15.6 (18.8)         | 19.9 (23.0)          | 22.4 (29.1)                      | 17.009 (20.897)         |
| Protein atoms (water)                      | 4675 (410)          | 2151 (229)           | 2089 (51)                        | 2215 (241)              |
| Rmsd bond length [Å]                       | 0.014               | 0.011                | 0.012                            | 0.017                   |
| Rmsd bond angle                            | 1.434               | 1.402                | 1.347                            | 1.593                   |
| Hetero groups:                             | CL, EDO, SCN        |                      | SO4                              | MLT                     |
| <b>Ramachandran</b>                        |                     |                      |                                  |                         |
| (allowed, disallowed) [%]                  | 99.7, 0.3           | 99.6, 0.4            | 99.6, 0.4                        | 99.6, 0.4               |

| <b>Data collection</b>                     | <b>2OC3 (BDP1)</b>   | <b>2JJD (RPTP<sub>8</sub>)</b> |
|--------------------------------------------|----------------------|--------------------------------|
| Space group                                | P2 <sub>1</sub>      | P2 <sub>1</sub>                |
| Cell dimensions [Å]                        | 46.34, 63.76, 48.99  | 126.02, 123.62, 219.12         |
| Cell angles [°]                            | 90.00, 102.64, 90.00 | 90.00, 91.13, 90.00            |
| Resolution [Å]                             | 1.50                 | 3.20                           |
| Total obs. (Unique, red.)                  | 162935 (44277, 3.7)  | 373908 (109786, 3.4)           |
| Completeness (outer shell)                 | 99.3% (95.2%)        | 98.7% (92.4%)                  |
| R <sub>merge</sub>                         | 0.065                | 0.145                          |
| I/σ (outer shell)                          | 12.4 (3.4)           | 9.0 (1.5)                      |
| <b><u>Refinement</u></b>                   |                      |                                |
| R <sub>work</sub> (R <sub>free</sub> ) (%) | 15.4 (18.4)          | 22.1 (25.6)                    |
| Protein atoms (water)                      | 2228 (277)           | 23738 (12)                     |
| Rmsd bond length [Å]                       | 0.014                | 0.010                          |
| Rmsd bond angle                            | 1.471                | 1.169                          |
| Hetero groups:                             |                      | CL                             |
| <b><u>Ramachandran</u></b>                 |                      |                                |
| (allowed, disallowed) [%]                  | 99.6, 0.4            | 99.2, 0.8                      |



**Figure S1**

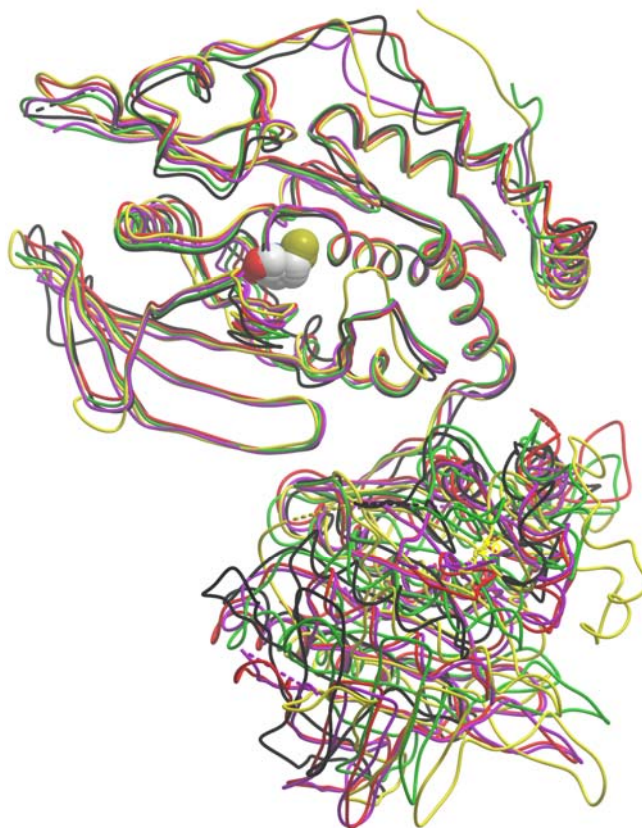

**Figure S1:** Superimposition of tandem domain RPTP structures. Superimposition of available tandem domain receptor PTP structures reveals that the orientation of D1 and D2 domains is highly conserved. RPTP $\gamma$  (Black, PDB: 2NLK); CD45 (Yellow, PDB: 1YGR); LAR (Red, PDB: 1LAR); RPTP $\sigma$  (Green, PDB: 2FH7) and RPTP $\epsilon$  (Magenta, PDB: 2JJJ). The catalytic cysteine of D1 domain is shown as CPK representation for orientation.

**Table S2****Residues involved in the D1-D2 interface of tandem domain  
RPTP structures**

| RPTP $\gamma$ (PTPRG)                         | D1 Domain                                                     | D2 Domain                                                      |
|-----------------------------------------------|---------------------------------------------------------------|----------------------------------------------------------------|
| <b>Number of Residues</b>                     |                                                               |                                                                |
| interface                                     | 19 (6.5%)                                                     | 23 (8.8%)                                                      |
| surface                                       | 263 (90.4%)                                                   | 235 (89.7%)                                                    |
| total                                         | 291 (100%)                                                    | 262 (100%)                                                     |
| <b>Solvent-accessible area, Å<sup>2</sup></b> |                                                               |                                                                |
| interface                                     | 779.6 (5.5%)                                                  | 722.9 (6.0%)                                                   |
| total                                         | 14277.1 (100%)                                                | 12063.6 (100.0%)                                               |
| <b>Hydrogen Bonds</b>                         | Thr1040 [OG1]<br>Ala987 [N]<br>Arg1044 [NH2]<br>Arg1044 [NH2] | Gln1381 [NE2]<br>Tyr1214 [O]<br>Glu1126 [OE1]<br>Glu1374 [OE1] |
| <b>Salt Bridges</b>                           | Arg1044 [NH2]<br>Arg1044 [NH2]                                | Glu1126 [OE1]<br>Glu1374 [OE1]                                 |

  

| CD45 (PTPRC)                                  | D1 Domain                                                  | D2 Domain                                                     |
|-----------------------------------------------|------------------------------------------------------------|---------------------------------------------------------------|
| <b>Number of Residues</b>                     |                                                            |                                                               |
| interface                                     | 19 (6.5%)                                                  | 19 (6.7%)                                                     |
| surface                                       | 268 (91.8%)                                                | 260 (92.2%)                                                   |
| total                                         | 292 (100%)                                                 | 282 (100%)                                                    |
| <b>Solvent-accessible area, Å<sup>2</sup></b> |                                                            |                                                               |
| interface                                     | 694.0 (5.1%)                                               | 709.2 (5.1%)                                                  |
| total                                         | 13645.1 (100%)                                             | 13784.2 (100.0%)                                              |
| <b>Hydrogen Bonds</b>                         | Asp766 [OD1]<br>Arg811 [NE]<br>Arg811 [NH2]<br>Tyr767 [OH] | Lys1003 [NZ]<br>Glu894 [OE1]<br>Glu894 [OE2]<br>Glu1167 [OE2] |
| <b>Salt Bridges</b>                           | Asp766 [OD1]<br>Arg811 [NE]<br>Arg811 [NH2]                | Lys1003 [NZ]<br>Glu894 [OE1]<br>Glu894 [OE2]                  |

| RPTP $\sigma$ (PTPRS)                         | D1 Domain                                                   | D2 Domain                                                    |
|-----------------------------------------------|-------------------------------------------------------------|--------------------------------------------------------------|
| <b>Number of Residues</b>                     |                                                             |                                                              |
| interface                                     | 18 (6.3%)                                                   | 22 (7.8%)                                                    |
| surface                                       | 248 (87.0%)                                                 | 253 (89.4%)                                                  |
| total                                         | 285 (100%)                                                  | 283 (100%)                                                   |
| <b>Solvent-accessible area, Å<sup>2</sup></b> |                                                             |                                                              |
| interface                                     | 742.5 (5.6%)                                                | 666.3 (4.9%)                                                 |
| total                                         | 13285.0 (100%)                                              | 13460.6 (100.0%)                                             |
| <b>Hydrogen Bonds</b>                         | Glu1562 [OE1]<br>Ala1527 [N]                                | Ser1719 [OG]<br>Tyr1744 [O]                                  |
| <hr/>                                         |                                                             |                                                              |
| LAR (PTPRF)                                   | D1 Domain                                                   | D2 Domain                                                    |
| <b>Number of Residues</b>                     |                                                             |                                                              |
| interface                                     | 20 (7.2%)                                                   | 22 (7.6%)                                                    |
| surface                                       | 247 (88.8%)                                                 | 259 (89.9%)                                                  |
| total                                         | 278 (100%)                                                  | 288 (100%)                                                   |
| <b>Solvent-accessible area, Å<sup>2</sup></b> |                                                             |                                                              |
| interface                                     | 661.8 (5.1%)                                                | 621.2 (4.6%)                                                 |
| total                                         | 12935.4 (100%)                                              | 13574.4 (100.0%)                                             |
| <b>Hydrogen Bonds</b>                         | Glu1495 [OE1]<br>Tyr1496 [OH]<br>Ala1581 [O]<br>Ala1460 [N] | Arg1629 [NH2]<br>Arg1629 [NH2]<br>Gly1585 [N]<br>Tyr1677 [O] |
| <b>Salt Bridges</b>                           | Glu1495 [OE1]<br>Arg1506 [NH1]                              | Arg1629 [NH2]<br>Glu1836 [OE2]                               |

**Figure S2**

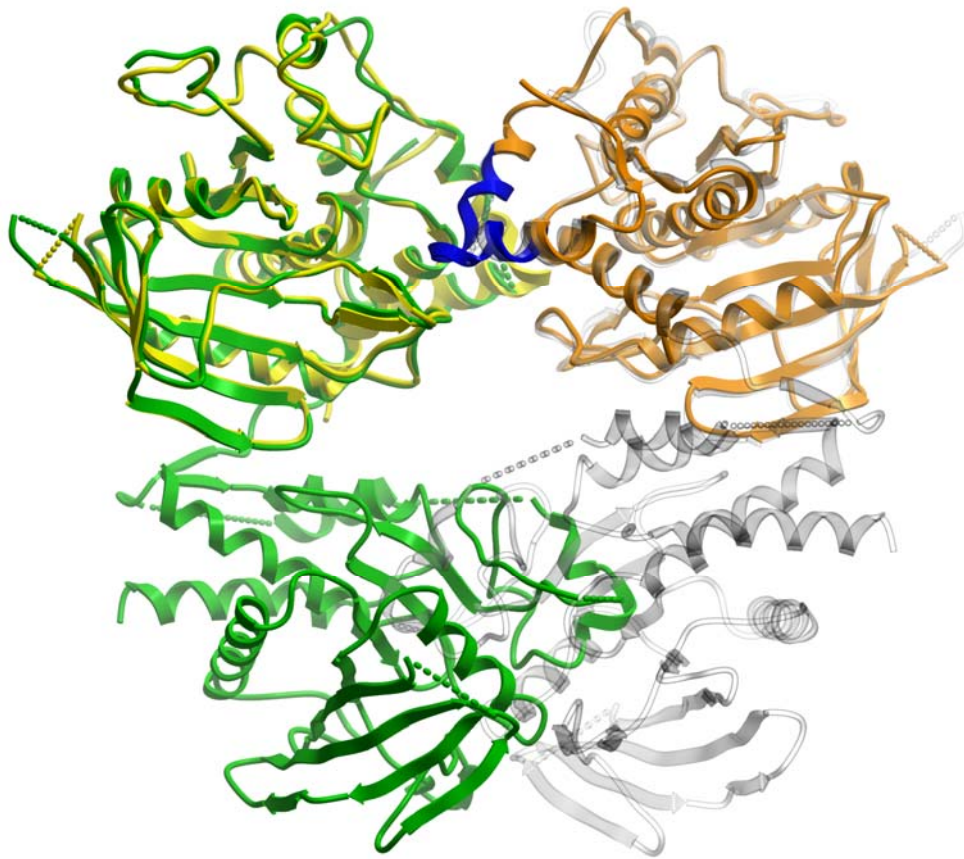

**Figure S2:** Theoretical arrangement of tandem domain RPTPs according to the ‘inhibitory wedge’ model. Two RPTP $\alpha$  D1 domains (yellow and orange) are shown in the dimeric form found in the crystal structure (PDB: 1YFO). The N-terminal inhibitory wedge is shown in blue blocking the active site of the opposing monomer. The structure of the tandem domain RPTP $\epsilon$  (PDB: 2JJD) has been superimposed on each RPTP $\alpha$  D1 domain (green and grey shadow) revealing a steric clash of D2 domains making this conformation involving the inhibitory wedge impossible.

## Table S3

### Details of the RPTP $\gamma$ head to toe dimer interface (PDB: 2NLK)

|                                               | Molecule A       |
|-----------------------------------------------|------------------|
| <b>Number of Atoms</b>                        |                  |
| Interface (%)                                 | 132 (3.0%)       |
| Surface (%)                                   | 2323 (53.0%)     |
| Total (%)                                     | 4386 (100.0%)    |
| <b>Number of Residues</b>                     |                  |
| Interface (%)                                 | 38 (6.9%)        |
| Surface (%)                                   | 498 (90.1%)      |
| Total (%)                                     | 553 (100.0%)     |
| <b>Solvent-accessible area, Å<sup>2</sup></b> |                  |
| Interface / monomer (%)                       | 1217.8 (4.9%)    |
| <u>total</u> (%)                              | 24838.2 (100.0%) |

| Hydrogen bonds |                 |              |                 |
|----------------|-----------------|--------------|-----------------|
|                | Molecule A      | Distance [Å] | Molecule B      |
| 1              | A:ARG 958[ NE ] | 2.82         | A:ASN1242[ OD1] |
| 2              | A:ARG 958[ NH2] | 2.79         | A:TRP1239[ O ]  |
| 3              | A:GLY1030[ N ]  | 2.96         | A:GLN1304[ O ]  |
| 4              | A:ALA1062[ N ]  | 2.84         | A:ASP1306[ OD2] |
| 5              | A:GLU1107[ OE1] | 2.68         | A:GLN1304[ NE2] |
| Salt bridges   |                 |              |                 |
| 1              | A:LYS 960[ NZ ] | 3.05         | A:ASP1305[ OD1] |
| 2              | A:LYS 960[ NZ ] | 2.88         | A:ASP1305[ OD2] |
| 3              | A:LYS 960[ NZ ] | 2.62         | A:ASP1306[ OD1] |
| 4              | A:ARG1066[ NH2] | 3.48         | A:ASP1305[ OD1] |
|                |                 |              |                 |

**Figure S3**

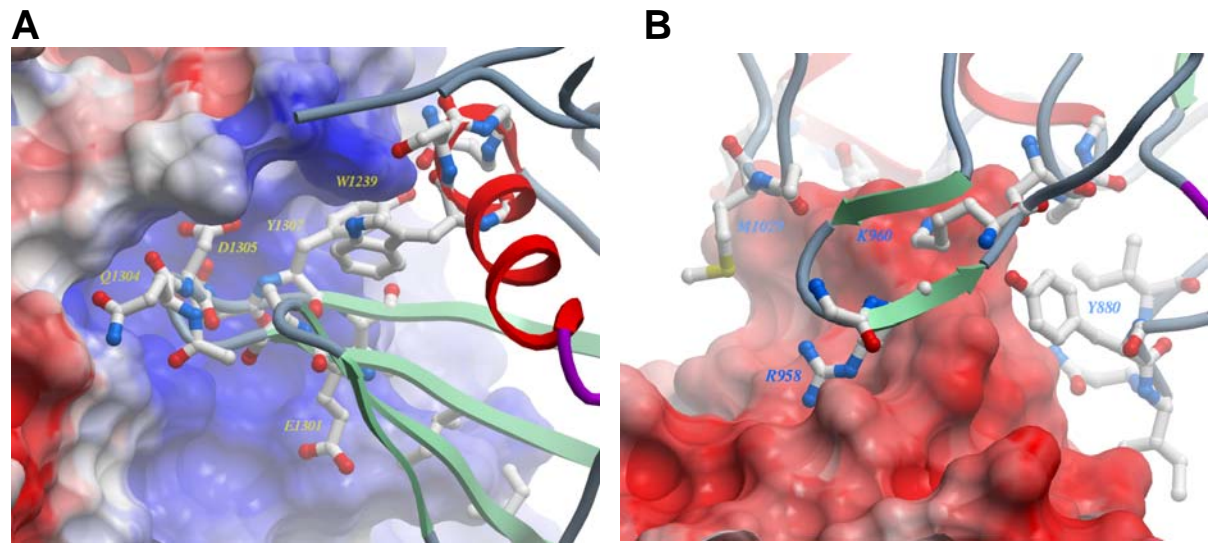

**Figure S3:** Details of the RPTP $\gamma$  dimer interface. (A) The surface of the RPTP $\gamma$  D1 domain and residues from the D2 domain (loop  $\beta$ 10- $\beta$ 11) of an interacting molecule in the dimeric form are shown. (B) The surface of the RPTP $\gamma$  D2 domain and residues from the D1 domain (sheet  $\beta$ 6) of an interacting molecule in the dimeric form are shown

**Figure S4**

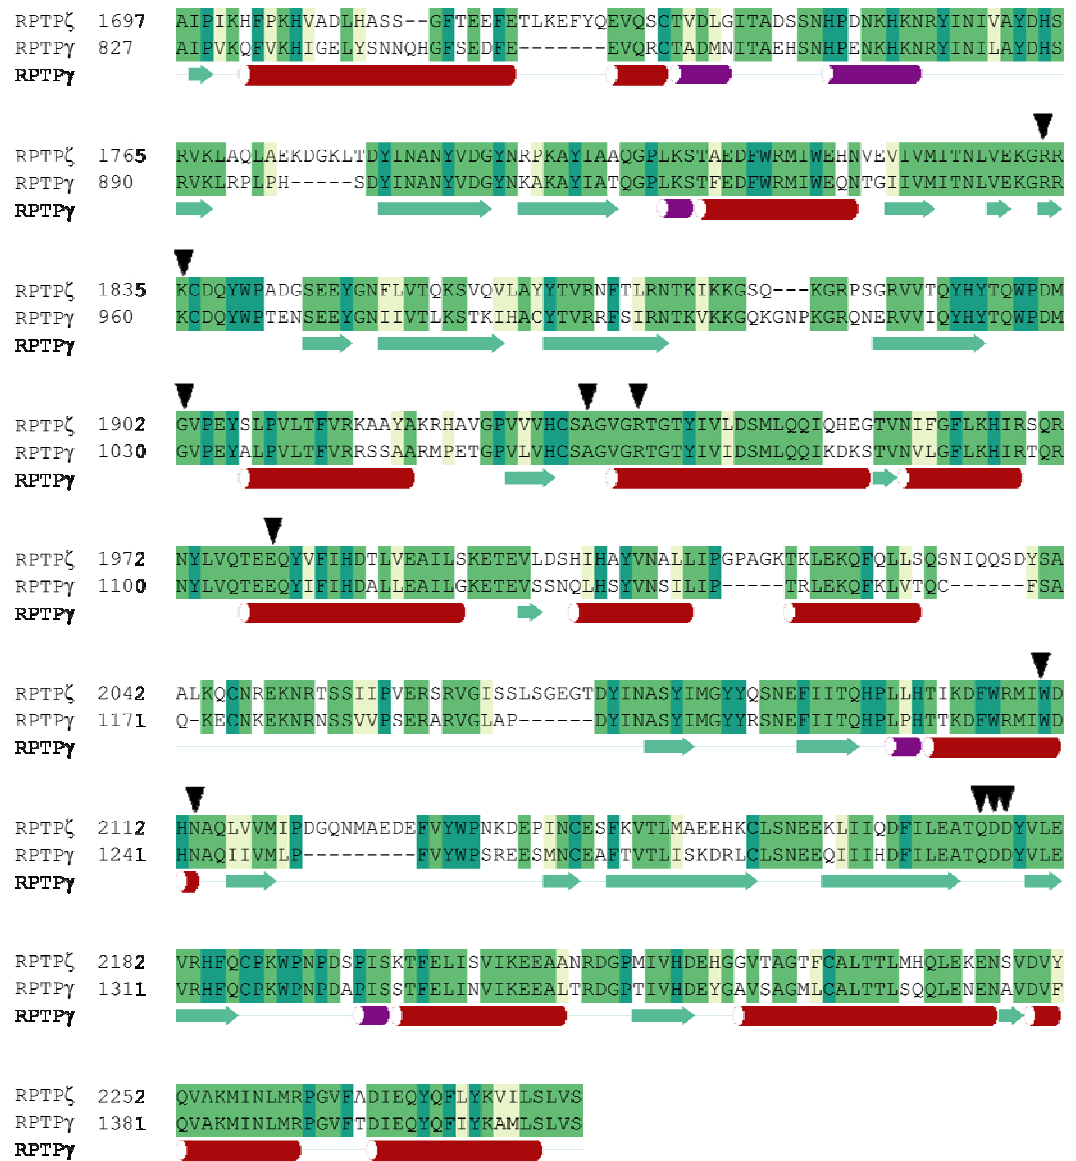

**Figure S4:** Sequence alignment of RPTP $\gamma$  and RPTP $\zeta$  showing conservation of residues involved in the dimer interface (indicated by arrows).

**Figure S5**

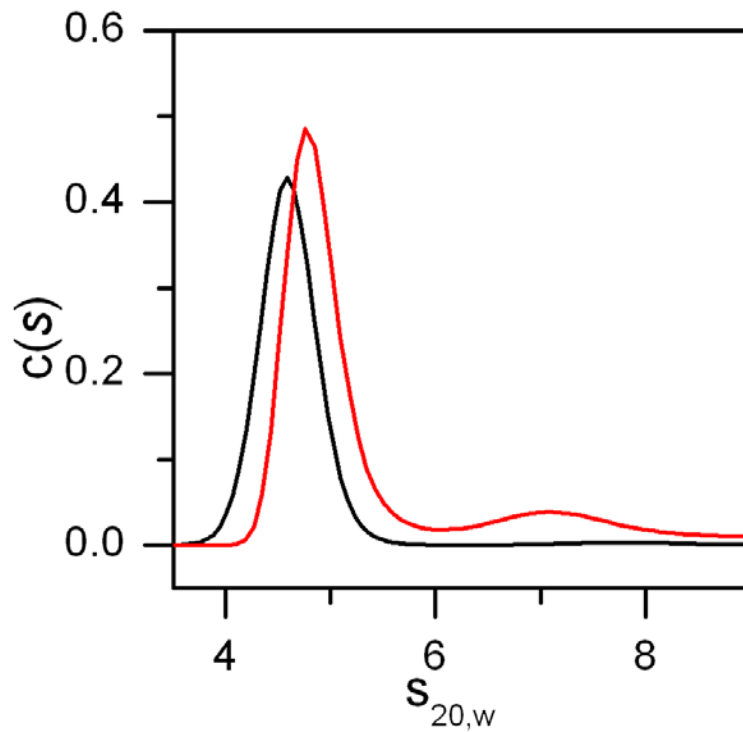

**Figure S5:** Effect of oxidation on the oligomeric state of RPTP $\alpha$ .

Sedimentation velocity AUC measurements using RPTP $\alpha$  (black) and RPTP $\alpha$  treated with  $H_2O_2$  (5  $\mu$ M) for 30 minutes (red). Experiments were conducted with a protein concentration of 0.5 mg/ml for control RPTP $\alpha$  and 0.8 mg/ml for  $H_2O_2$  treated RPTP $\alpha$ . The data show that, in agreement with other reports, oxidation induces dimerization as assessed by AUC; however, higher concentrations of  $H_2O_2$  (25  $\mu$ M) led to significant formation of oligomers up to a large molecular weight indicative of protein aggregation (data not shown).



**Table S4****Templates used for homology models of PTPs**

| <b>PTP homology models</b> |                      |                     |                          |
|----------------------------|----------------------|---------------------|--------------------------|
| <b>PTP Model</b>           | <b>Swiss Prot ID</b> | <b>PTP Template</b> | <b>Template PDB code</b> |
| PTPN12                     | Q05209               | PTPN22              | 2P6X                     |
| PTPN20                     | Q4JDL3               | PTPN13              | 1WCH                     |
| PTPN21                     | Q16825               | PTPN14              | 2BZL                     |
| PTPRU                      | Q92729               | PTPRS               | 2FH7                     |
| PTPRM (D2)                 | P28827               | PTPRS (D2)          | 2FH7                     |
| PTPRK (D2)                 | Q15262               | PTPRS (D2)          | 2FH7                     |
| PTPRT (D2)                 | O14522               | PTPRF (D2)          | 1LAR                     |
| PTPRH                      | Q9HD43               | PTPRB               | 2AHS                     |
| PTPRQ                      | Q9UMZ3               | PTPRO               | 2GJT                     |
| PTPRZ                      | P23471               | PTPRG               | 2NLK                     |
| PTPN23                     | Q9H3S7               | PTPN2               | 1L8K                     |

Table S5

## Secondary Site loop conformations and gateway residues

| PTP             | Gateway  |        | Secondary site loop |              | Category |
|-----------------|----------|--------|---------------------|--------------|----------|
|                 | Residues | Access | Access [Arg24]      | Conformation |          |
| SHP2            | SG       | 0      | open                | Q            | I        |
| BDP1            | PA       | 1      | open                | Q            | I        |
| LYP             | PS       | 1      | open                | K            | I        |
| RPTP $\gamma$   | NY       | 3      | open                | Q            | I        |
| SHP1            | SG       | 0      | open                | Q            | I        |
| PEST            | HS       | n/a    | n/a                 | R            |          |
| RPTP $\zeta$    | NY       | 3      | open                | Q            |          |
| PTP1B           | MG       | 1      | open                | R            | I        |
| TCPTP           | MG       | 1      | open                | R            | I        |
| MEG2            | AF       | 1      | open                | R            | I        |
| BAS             | HG       | 1      | open                | Q            | I        |
| TYP             | SG       | n/a    | n/a                 | Q            |          |
| HDPTP           | KH       | n/a    | n/a                 | Q            |          |
| RPTP $\beta$    | VH       | 3      | open                | K            | I        |
| DEP1            | PL       | 2      | open                | K            | I        |
| GLEPP1          | MS       | 2      | open                | K            | I        |
| SAP1            | VL       | n/a    | n/a                 | S            |          |
| PTPS31          | MC       | n/a    | n/a                 | P            |          |
| IA2             | PG       | 0      | open                | C            | II       |
| IA2 $\beta$     | PG       | 0      | open                | C            | II       |
| RPTP $\delta$   | NY       | 3      | open                | D            | III      |
| LAR             | NY       | 3      | open                | D            | III      |
| RPTP $\sigma$   | NY       | 3      | open                | D            | III      |
| RPTP $\kappa$   | IN       | 2      | closed              | F            | IV       |
| RPTP $\mu$      | VN       | 2      | closed              | F            | IV       |
| RPTP $\tau$     | VN       | 2      | closed              | P            | IV       |
| RPTP $\lambda$  | VN       | n/a    | n/a                 | F            |          |
| PTPH1           | AM       | 3      | closed              | Y            | IV       |
| MEG1            | AM       | 3      | closed              | Y            | IV       |
| PTPD2           | MF       | 3      | closed              | P            | IV       |
| CD45            | CL       | 2      | closed              | P            | IV       |
| PTPD1           | MM       | n/a    | n/a                 | L            |          |
| PCPT1           | GG       | 0      | closed              | P            | V        |
| STEP            | GG       | 0      | closed              | P            | V        |
| HEPTP           | GG       | 0      | closed              | P            | V        |
| RPTP $\alpha$   | CQ       | 3      | closed              | P            | IV       |
| RPTP $\epsilon$ | PQ       | 3      | closed              | P            | IV       |

**Table S5:** PTPs have been grouped into five categories according to accessibility via the gateway region, the second site loop conformation and characteristics of the residue corresponding to Arg24 of PTP1B. Accessibility via the gateway based on analysis of the structures is indicated via a score from 0 to 3 (0 = accessible gateway; 3 = hindered

gateway) and the conformation of the second site loop is indicated. Analysis was carried out on PTP crystal structures (black) and homology models (red).
